# Supplementary material for: A single-crystal to single-crystal phase transition in [Co(NH3)5NO2]Br2 at high pressure: a step towards understanding linkage photo-isomerisation
Source: Royal Society of Chemistry journal article supplement (doi:10.1039/c5ce01820j), 2015-01-01
Supplement: c5ce01820j2.pdf [file c5ce01820j2.pdf]

**Table S1. Experimental details**

For all structures:  $\text{CoH}_{15}\text{N}_6\text{O}_2 \cdot 2(\text{Br})$ ,  $M_r = 349.93$ ,  $Z = 4$ . Experiments were carried out at 295 K with Mo K $\alpha$  radiation using a Xcalibur, Ruby, Gemini diffractometer. H-atom parameters were constrained.

|                                                                            | 0.0001 GPa                                                             | 0.15 GPa                                                               | 0.58 GPa                                                               | 0.97 GPa                                                               |
|----------------------------------------------------------------------------|------------------------------------------------------------------------|------------------------------------------------------------------------|------------------------------------------------------------------------|------------------------------------------------------------------------|
| Crystal data                                                               |                                                                        |                                                                        |                                                                        |                                                                        |
| Crystal system, space group                                                | Monoclinic, $C2/c$                                                     | Monoclinic, $C2/c$                                                     | Monoclinic, $C2/c$                                                     | Monoclinic, $C2/c$                                                     |
| $a, b, c$ (Å)                                                              | 10.6807 (6),<br>8.8299 (8),<br>10.9759 (5)                             | 10.6575 (5),<br>8.7649 (9),<br>10.9567 (5)                             | 10.6184 (4),<br>8.6082 (8),<br>10.9307 (4)                             | 10.6243 (5),<br>8.4030 (8),<br>10.9113 (5)                             |
| $\alpha, \beta, \gamma$ (°)                                                | 90, 94.604 (5),<br>90                                                  | 90, 94.589 (5),<br>90                                                  | 90, 94.591 (4),<br>90                                                  | 90, 94.483 (4),<br>90                                                  |
| $V$ (Å <sup>3</sup> )                                                      | 1031.79 (12)                                                           | 1020.21 (12)                                                           | 995.92 (11)                                                            | 971.14 (11)                                                            |
| No. of reflections for cell measurement                                    | 1571                                                                   | 1795                                                                   | 1799                                                                   | 1835                                                                   |
| $\theta$ range (°) for cell measurement                                    | 2.8–27.4                                                               | 2.8–27.8                                                               | 2.8–28.1                                                               | 2.8–27.6                                                               |
| $\mu$ (mm <sup>-1</sup> )                                                  | 9.38                                                                   | 9.49                                                                   | 9.72                                                                   | 9.97                                                                   |
| Crystal size (mm)                                                          | 0.20 × 0.20 ×<br>0.05                                                  |
| Data collection                                                            |                                                                        |                                                                        |                                                                        |                                                                        |
| $T_{\min}, T_{\max}$                                                       | 0.233, 0.302                                                           | 0.231, 0.300                                                           | 0.228, 0.297                                                           | 0.225, 0.293                                                           |
| No. of measured, independent and observed [ $I > 2\sigma(I)$ ] reflections | 2634, 605, 532                                                         | 2719, 588, 541                                                         | 2610, 569, 518                                                         | 2651, 562, 522                                                         |
| $R_{\text{int}}$                                                           | 0.059                                                                  | 0.056                                                                  | 0.054                                                                  | 0.051                                                                  |
| $(\sin \theta/\lambda)_{\text{max}}$ (Å <sup>-1</sup> )                    | 0.625                                                                  | 0.625                                                                  | 0.625                                                                  | 0.624                                                                  |
| Range of $h, k, l$                                                         | $h = -12 \rightarrow 12, k = -8 \rightarrow 8, l = -13 \rightarrow 13$ | $h = -12 \rightarrow 12, k = -8 \rightarrow 8, l = -13 \rightarrow 13$ | $h = -12 \rightarrow 12, k = -8 \rightarrow 8, l = -13 \rightarrow 13$ | $h = -12 \rightarrow 12, k = -8 \rightarrow 8, l = -13 \rightarrow 13$ |
| Refinement                                                                 |                                                                        |                                                                        |                                                                        |                                                                        |
| $R[F^2 > 2\sigma(F^2)], wR(F^2), S$                                        | 0.029, 0.068,<br>1.11                                                  | 0.027, 0.058,<br>1.08                                                  | 0.027, 0.063,<br>1.06                                                  | 0.024, 0.056,<br>1.12                                                  |
| No. of reflections                                                         | 605                                                                    | 588                                                                    | 569                                                                    | 562                                                                    |
| No. of parameters                                                          | 52                                                                     | 52                                                                     | 52                                                                     | 52                                                                     |
| No. of restraints                                                          | 0                                                                      | 0                                                                      | 0                                                                      | 0                                                                      |
| $\Delta\rho_{\text{max}}, \Delta\rho_{\text{min}}$ (e Å <sup>-3</sup> )    | 0.40, -0.36                                                            | 0.50, -0.30                                                            | 0.31, -0.34                                                            | 0.33, -0.32                                                            |

|                                                                                                                            | 1.61 GPa                                                     | 2.60 GPa                                                     | 3.30 GPa                                                     | 3.80 GPa                                                     |
|----------------------------------------------------------------------------------------------------------------------------|--------------------------------------------------------------|--------------------------------------------------------------|--------------------------------------------------------------|--------------------------------------------------------------|
| Crystal data                                                                                                               |                                                              |                                                              |                                                              |                                                              |
| Crystal system, space group                                                                                                | Monoclinic, <i>C2/c</i>                                      | Monoclinic, <i>C2/c</i>                                      | Monoclinic, <i>C2/c</i>                                      | Monoclinic, <i>C2/c</i>                                      |
| <i>a</i> , <i>b</i> , <i>c</i> (Å)                                                                                         | 10.6792 (4),<br>8.0977 (7),<br>10.9004 (4)                   | 10.6750 (5),<br>7.8148 (8),<br>10.8204 (4)                   | 10.6557 (4),<br>7.7006 (7),<br>10.7594 (4)                   | 10.6379 (4),<br>7.6361 (6),<br>10.7112 (3)                   |
| $\alpha$ , $\beta$ , $\gamma$ (°)                                                                                          | 90, 94.192 (4),<br>90                                        | 90, 93.829 (4),<br>90                                        | 90, 93.693 (4),<br>90                                        | 90, 93.601 (3),<br>90                                        |
| <i>V</i> (Å <sup>3</sup> )                                                                                                 | 940.11 (10)                                                  | 900.66 (11)                                                  | 881.03 (9)                                                   | 868.38 (8)                                                   |
| No. of reflections for cell measurement                                                                                    | 1813                                                         | 1806                                                         | 1745                                                         | 1743                                                         |
| $\theta$ range (°) for cell measurement                                                                                    | 3.2–27.8                                                     | 2.8–27.7                                                     | 2.8–28.0                                                     | 2.8–28.2                                                     |
| $\mu$ (mm <sup>-1</sup> )                                                                                                  | 10.30                                                        | 10.75                                                        | 10.99                                                        | 11.15                                                        |
| Crystal size (mm)                                                                                                          | 0.20 × 0.20 ×<br>0.05                                        |
| Data collection                                                                                                            |                                                              |                                                              |                                                              |                                                              |
| <i>T</i> <sub>min</sub> , <i>T</i> <sub>max</sub>                                                                          | 0.219, 0.288                                                 | 0.215, 0.282                                                 | 0.212, 0.279                                                 | 0.210, 0.277                                                 |
| No. of measured, independent and observed [ <i>I</i> > 2 $\sigma$ ( <i>I</i> )] reflections                                | 2485, 528, 490                                               | 2359, 502, 457                                               | 1398, 484, 439                                               | 1833, 478, 443                                               |
| <i>R</i> <sub>int</sub>                                                                                                    | 0.055                                                        | 0.056                                                        | 0.041                                                        | 0.049                                                        |
| ( <i>sin</i> $\theta$ / $\lambda$ ) <sub>max</sub> (Å <sup>-1</sup> )                                                      | 0.624                                                        | 0.625                                                        | 0.624                                                        | 0.625                                                        |
| Range of <i>h</i> , <i>k</i> , <i>l</i>                                                                                    | <i>h</i> = -12→12, <i>k</i> =<br>-7→7, <i>l</i> = -<br>13→13 | <i>h</i> = -12→12, <i>k</i> =<br>-7→7, <i>l</i> = -<br>13→13 | <i>h</i> = -12→12, <i>k</i> =<br>-7→7, <i>l</i> = -<br>13→12 | <i>h</i> = -12→12, <i>k</i> =<br>-7→7, <i>l</i> = -<br>13→13 |
| Refinement                                                                                                                 |                                                              |                                                              |                                                              |                                                              |
| <i>R</i> [ <i>F</i> <sup>2</sup> > 2 $\sigma$ ( <i>F</i> <sup>2</sup> )],<br><i>wR</i> ( <i>F</i> <sup>2</sup> ), <i>S</i> | 0.024, 0.053,<br>1.06                                        | 0.023, 0.055,<br>1.11                                        | 0.025, 0.051,<br>1.12                                        | 0.022, 0.050,<br>1.08                                        |
| No. of reflections                                                                                                         | 528                                                          | 502                                                          | 484                                                          | 478                                                          |
| No. of parameters                                                                                                          | 52                                                           | 52                                                           | 52                                                           | 52                                                           |
| No. of restraints                                                                                                          | 0                                                            | 0                                                            | 0                                                            | 42                                                           |
| $\Delta\rho$ <sub>max</sub> , $\Delta\rho$ <sub>min</sub> (e Å <sup>-3</sup> )                                             | 0.31, -0.45                                                  | 0.30, -0.35                                                  | 0.32, -0.32                                                  | 0.33, -0.26                                                  |

|              | 4.40 GPa | 4.80 GPa | 5.50 GPa | 6.01 GPa |
|--------------|----------|----------|----------|----------|
| Crystal data |          |          |          |          |

|                                                                                                                            |                                                              |                                                              |                                                              |                                                              |
|----------------------------------------------------------------------------------------------------------------------------|--------------------------------------------------------------|--------------------------------------------------------------|--------------------------------------------------------------|--------------------------------------------------------------|
| Crystal system, space group                                                                                                | Monoclinic, <i>C2/c</i>                                      | Monoclinic, <i>C2/c</i>                                      | Monoclinic, <i>C2/c</i>                                      | Monoclinic, <i>C2/c</i>                                      |
| <i>a</i> , <i>b</i> , <i>c</i> (Å)                                                                                         | 10.6148 (4),<br>7.5680 (7),<br>10.6476 (4)                   | 10.6023 (5),<br>7.5308 (7),<br>10.6049 (4)                   | 10.5931 (4),<br>7.4783 (7),<br>10.5357 (4)                   | 10.5914 (5),<br>7.4435 (7),<br>10.4601 (4)                   |
| $\alpha$ , $\beta$ , $\gamma$ (°)                                                                                          | 90, 93.508 (3),<br>90                                        | 90, 93.439 (4),<br>90                                        | 90, 93.300 (4),<br>90                                        | 90, 93.121 (4),<br>90                                        |
| <i>V</i> (Å <sup>3</sup> )                                                                                                 | 853.75 (9)                                                   | 845.21 (9)                                                   | 833.24 (9)                                                   | 823.42 (9)                                                   |
| No. of reflections for cell measurement                                                                                    | 1712                                                         | 1704                                                         | 1697                                                         | 1683                                                         |
| $\theta$ range (°) for cell measurement                                                                                    | 2.6–28.2                                                     | 2.6–27.8                                                     | 2.8–27.9                                                     | 2.8–28.0                                                     |
| $\mu$ (mm <sup>-1</sup> )                                                                                                  | 11.34                                                        | 11.45                                                        | 11.62                                                        | 11.76                                                        |
| Crystal size (mm)                                                                                                          | 0.20 × 0.20 ×<br>0.05                                        |
| Data collection                                                                                                            |                                                              |                                                              |                                                              |                                                              |
| <i>T</i> <sub>min</sub> , <i>T</i> <sub>max</sub>                                                                          | 0.208, 0.274                                                 | 0.207, 0.272                                                 | 0.205, 0.270                                                 | 0.205, 0.268                                                 |
| No. of measured, independent and observed [ <i>I</i> > 2 $\sigma$ ( <i>I</i> )] reflections                                | 2262, 488, 455                                               | 2236, 482, 451                                               | 2182, 475, 441                                               | 2170, 469, 438                                               |
| <i>R</i> <sub>int</sub>                                                                                                    | 0.055                                                        | 0.055                                                        | 0.050                                                        | 0.056                                                        |
| (sin $\theta/\lambda$ ) <sub>max</sub> (Å <sup>-1</sup> )                                                                  | 0.625                                                        | 0.625                                                        | 0.625                                                        | 0.625                                                        |
| Range of <i>h</i> , <i>k</i> , <i>l</i>                                                                                    | <i>h</i> = -12→12, <i>k</i> =<br>-7→7, <i>l</i> = -<br>13→13 | <i>h</i> = -12→12, <i>k</i> =<br>-7→7, <i>l</i> = -<br>13→13 | <i>h</i> = -12→12, <i>k</i> =<br>-7→7, <i>l</i> = -<br>12→12 | <i>h</i> = -12→12, <i>k</i> =<br>-7→7, <i>l</i> = -<br>12→12 |
| Refinement                                                                                                                 |                                                              |                                                              |                                                              |                                                              |
| <i>R</i> [ <i>F</i> <sup>2</sup> > 2 $\sigma$ ( <i>F</i> <sup>2</sup> )],<br><i>wR</i> ( <i>F</i> <sup>2</sup> ), <i>S</i> | 0.024, 0.058,<br>1.08                                        | 0.025, 0.060,<br>1.07                                        | 0.023, 0.056,<br>1.10                                        | 0.026, 0.062,<br>1.09                                        |
| No. of reflections                                                                                                         | 488                                                          | 482                                                          | 475                                                          | 469                                                          |
| No. of parameters                                                                                                          | 52                                                           | 52                                                           | 52                                                           | 52                                                           |
| No. of restraints                                                                                                          | 0                                                            | 0                                                            | 0                                                            | 0                                                            |
| $\Delta\rho$ <sub>max</sub> , $\Delta\rho$ <sub>min</sub> (e Å <sup>-3</sup> )                                             | 0.33, -0.30                                                  | 0.39, -0.38                                                  | 0.44, -0.36                                                  | 0.46, -0.39                                                  |

|                                    |                                      |
|------------------------------------|--------------------------------------|
|                                    | 6.85 GPa_HP_phase                    |
| Crystal data                       |                                      |
| Crystal system, space group        | Orthorhombic, <i>Cmcm</i>            |
| <i>a</i> , <i>b</i> , <i>c</i> (Å) | 10.7595 (5), 7.4390 (6), 10.0890 (4) |

|                                                                            |                                                                        |
|----------------------------------------------------------------------------|------------------------------------------------------------------------|
| $\alpha, \beta, \gamma$ (°)                                                | 90, 90, 90                                                             |
| $V$ (Å <sup>3</sup> )                                                      | 807.52 (8)                                                             |
| No. of reflections for cell measurement                                    | 1696                                                                   |
| $\theta$ range (°) for cell measurement                                    | 2.8–27.6                                                               |
| $\mu$ (mm <sup>-1</sup> )                                                  | 11.99                                                                  |
| Crystal size (mm)                                                          | 0.20 × 0.20 × 0.05                                                     |
| Data collection                                                            |                                                                        |
| $T_{\min}, T_{\max}$                                                       | 0.202, 0.265                                                           |
| No. of measured, independent and observed [ $I > 2\sigma(I)$ ] reflections | 2137, 333, 310                                                         |
| $R_{\text{int}}$                                                           | 0.062                                                                  |
| $(\sin \theta/\lambda)_{\text{max}}$ (Å <sup>-1</sup> )                    | 0.625                                                                  |
| Range of $h, k, l$                                                         | $h = -12 \rightarrow 12, k = -7 \rightarrow 7, l = -12 \rightarrow 12$ |
| Refinement                                                                 |                                                                        |
| $R[F^2 > 2\sigma(F^2)], wR(F^2), S$                                        | 0.027, 0.064, 1.05                                                     |
| No. of reflections                                                         | 333                                                                    |
| No. of parameters                                                          | 36                                                                     |
| No. of restraints                                                          | 42                                                                     |
| $\Delta\rho_{\text{max}}, \Delta\rho_{\text{min}}$ (e Å <sup>-3</sup> )    | 0.64, -0.52                                                            |
